# Supplementary material
Source: PubMed Central journal article supplement (PMC3773791)
Supplement: 1312545110_pnas.201312545SI.pdf [file 1312545110_pnas.201312545SI.pdf]

# Supporting Information

Tsuchiya and Eulgem 10.1073/pnas.1312545110

## SI Text

**Sequence Analyses of *RPP7*<sub>Krazo-2</sub> and *RPP7*<sub>Koch-1</sub>.** Resistance to *Peronospora parasitica* (*RPP7*)-like genes in Krazo-2 and Koch-1 were structurally highly similar. The genomic, cDNA, and deduced amino acid sequences of their *RPP7*-like genes were 98.4%, 96.9%, and 94.5% identical, respectively. In addition, the sequences of the *RPP7*-like genes in Krazo-2 and Koch-1 showed high similarity to that of respective genomic locations of Col-0 *RPP7* (Fig. S5B). Moreover, the genomic region from intron1 to exon2 of *ECL*, which is unique to *RPP7* in the Col-0 genome, is also conserved in the *RPP7*-like genes (Fig. S5B). Finally, blast searches of the deduced protein sequences of the *RPP7*-like genes against the TAIR10 CDS database ([www.arabidopsis.org/Blast/index.jsp](http://www.arabidopsis.org/Blast/index.jsp); TBLASTN option) gave the highest identity and the smallest E value for Col-0 *RPP7* (identity = 88%, E = 0.0 for the gene in Krazo-2; identity = 91%, E = 0.0 for the gene in Koch-1). Taken together, we concluded that these cloned and sequenced genes in Krazo-2 and Koch-1 are the orthologs of Col-0 *RPP7* and were therefore named *RPP7*<sub>Krazo-2</sub> or *RPP7*<sub>Koch-1</sub>, respectively.

## SI Materials and Methods

**Transgenic Lines.** The transgenic complementation lines expressing N-terminally HA-tagged EDM2 driven by EDM2 native promoter in the *edm2-2* background (*E2*<sub>pro</sub>:*HA-ED2*) were generated as described previously (1). Fourteen independent *E2*<sub>pro</sub>:*HA-ED2* lines were recovered. Among the complementation lines, we selected three homozygous lines that harbor a single copy of the transgene and whose transcript levels of *RPP7* are intermediate and partially (*E2*<sub>pro</sub>:*HA-EDM2a* and *b*) or almost completely (*E2*<sub>pro</sub>:*HA-EDM2c*) reverted to those in wild-type Col-0 (Fig. S1A). This variation of the extent of complementation in *RPP7* transcript levels is likely due to positional effects of *HA-EDM2* transgenes. To generate silencing lines for *EDM2*<sub>Krazo-2</sub>, *EDM2*<sub>Koch-1</sub>, and Col-0 *EDM2* in Krazo-2, Koch-1, and Col-0, respectively, the *EDM2* cDNA sequence conserved in these accessions was PCR-amplified using primers EDM2RNAi-F and EDM2RNAi-R (Table S1). The resulting PCR product was cloned into the gateway entry vector pDONR-zeo (Life Technologies) through BP reaction and sequenced to verify the insert. The cloned silencing trigger was recombined into the pJawohl8-RNAi vector (GenBank accession no. AF408413; kindly provided by Imre E. Somssich, Max Planck Institute for Plant Breeding Research, Cologne, Germany) through LR reaction generating the plasmid pJawohl8-EDM2. This binary vector was introduced into *Agrobacterium tumefaciens* strain GV3101(pMP90RK) and used to transform each *Arabidopsis* accession by the floral dipping method (2). The transformants were identified through BASTA selection.

**RNA Isolation and qRT-PCR Analysis.** Plants were grown in a controlled culture room at 22 °C under long-day conditions (16 h light/8 h dark) with white light illumination. Total RNA was isolated from 2-wk-old seedlings using TRIzol reagent (Life Technologies). One microgram of total RNA was incubated with 1 unit of DNase I, RNase-free (Thermo Scientific) in a total volume of 10  $\mu$ L at 37 °C for 30 min. After inactivation of DNase I by adding 1  $\mu$ L of 50 mM EDTA and heating to 65 °C for 10 min., RNA was reverse-transcribed using 200 units of Maxima reverse transcriptase (Thermo Scientific) and 100 pmol of oligo (dT)<sub>18</sub> or 20 pmol of gene-specific primers in a sample volume of 20  $\mu$ L. cDNA aliquots (0.5  $\mu$ L) were used as template for real-time qPCR using an MyiQ real-time PCR detection system (Bio-Rad). Each 25  $\mu$ L of reaction mix contained 12.5  $\mu$ L of iQ SYBR

green Supermix (Bio-Rad) and 0.6  $\mu$ M gene-specific primers. Melt curve analysis was performed to confirm specific PCR amplification. For each reaction, the threshold cycle value (Ct) was determined by setting the threshold within the logarithmic amplification phase. Serial dilutions of total cDNA were used to calculate the amplification efficiency of each primer set according to the equation  $E = 10^{[-1/\text{slope}]}$ . Relative transcript levels were calculated by a comparative Ct method using *Actin8* as a reference gene (3). To determine the ratio between transcript isoforms, the absolute copy numbers of cDNA molecules were measured by the standard curve method. RNA was reverse-transcribed with oligo(dT)<sub>18</sub>, and the same volume of cDNA aliquot (0.5  $\mu$ L each) from the same RT reaction was applied for the measurement of each RNA isoform. Templates to generate standard curves were plasmid vectors harboring full-length cDNA of *ECL* (for measurements of *ECL* transcripts) or *RPP7*-coding mRNA (for measurements of total exon1-containing and *RPP7*-coding transcripts). The primers used for RT-PCRs are listed in Table S1.

**Chromatin Immunoprecipitation.** Aerial parts of 3-wk-old plants (or 2-wk-old for the time-course experiments of *HpaHiks1* infection) were harvested and fixed in cross-linking buffer [1% formaldehyde, 0.4 M sucrose, 10 mM Tris-HCl (pH 8.0), 1 mM EDTA, 1 mM PMSF] for 15 min at room temperature under vacuuming. Cross-linking was quenched with 0.125 M glycine, and the materials were washed three times with water, dried with towels, frozen, and stored at -80 °C until use. Chromatin was extracted by grinding fixed tissues to powder in liquid N<sub>2</sub>, followed by homogenization in nuclei isolation buffer [0.25 M sucrose, 15 mM Pipes (pH 6.8), 5 mM MgCl<sub>2</sub>, 60 mM KCl, 15 mM NaCl, 1 mM CaCl<sub>2</sub>, 0.9% Triton X-100, 1 mM PMSF, 1% proteinase inhibitor mixture for plant cell and tissue extracts (Sigma-Aldrich)]. The homogenate was filtered through two layers of miracloth, and the filtrate was centrifuged for 20 min at 11,000  $\times$  g. The pellet was resuspended in nuclei lysis buffer [50 mM Hepes (pH 7.5), 150 mM NaCl, 10 mM EDTA, 1% SDS, 0.1% sodium deoxycholate, 1% Triton X-100, 1% proteinase inhibitor mixture]. The extracted protein-DNA was sheared by sonication to ~350- to 800-bp fragments and centrifuged. Supernatants were carefully quantified using a spectrophotometer. A fraction of the sonicated supernatants was saved and, after cross-linking reversion, was used as input control in qPCR measurement. For chromatin immunoprecipitation, 10  $\mu$ g of chromatin diluted ten times with ChIP dilution buffer [50 mM Hepes (pH7.5), 150 mM NaCl, 1 mM EDTA, 0.1% sodium deoxycholate, 1% Triton X-100, 1% proteinase inhibitor mixture] was precleared with 60  $\mu$ L of Dynabeads Protein A (Life Technologies) for 1 h at 4 °C. The precleared protein-DNA complex was immunoprecipitated overnight at 4 °C with 60  $\mu$ L of Dynabeads Protein A bound by an appropriate antibody. Also, a no-antibody negative control was performed by omitting antibody addition. After incubation, the magnetic beads were washed twice with low salt wash buffer [20 mM Tris-HCl (pH 8.0), 150 mM NaCl, 1.0% Triton X-100, 2 mM EDTA, 0.1% SDS], twice with high salt wash buffer [20 mM Tris-HCl (pH 8.0), 500 mM NaCl, 1% Triton X-100, 2 mM EDTA, 0.1% SDS], twice with LiCl wash buffer [10 mM Tris-HCl (pH 8.0), 250 mM LiCl, 1% Nonidet P-40, 1% sodium deoxycholate, 1 mM EDTA], and twice with TE buffer [10 mM Tris-HCl (pH 8.0), 1 mM EDTA]; the precipitated chromatin was eluted twice with elution buffer (0.1 M NaHCO<sub>3</sub>, 1% SDS). Cross-linking was reversed overnight at 65 °C in the presence of 0.3 M NaCl, and samples were treated with 2  $\mu$ g of

proteinase K for 3 h at 50 °C. Samples were then purified with the QIAquick PCR Purification columns (QIAGEN), and DNA was eluted twice with 50  $\mu$ L of buffer EB. Two microliters of eluted DNA was applied for qPCR. Two microliters of ChIPed DNA and 1% inputs were applied for qPCR analysis. ChIP signals were calculated using the  $2^{\Delta\Delta Ct}$  method as % of pre-

cipitated material relative to the amount of the input sample (% input). For H3K9me2 measurements, values of % input were further normalized to H3 occupancy to adjust for nucleosome density when appropriate. Fold enrichment of HA-EDM2 signals in the  $E2_{pro}:HA-E2c$  line was shown relative to nontransgenic Col-0 levels.

1. Tsuchiya T, Eulgem T (2013) Mutations in EDM2 selectively affect silencing states of transposons and induce plant developmental plasticity. *Sci Rep* 3:1701.
2. Clough SJ, Bent AF (1998) Floral dip: A simplified method for Agrobacterium-mediated transformation of *Arabidopsis thaliana*. *Plant J* 16(6):735–743.

3. Pfaffl MW (2001) A new mathematical model for relative quantification in real-time RT-PCR. *Nucleic Acids Res* 29(9):e45.

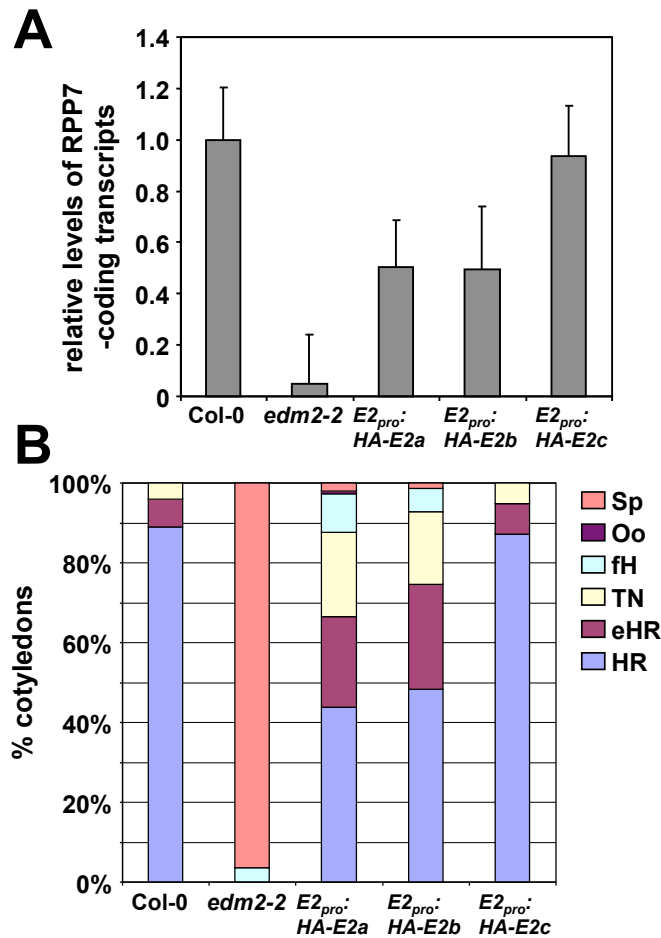

**Fig. S1.** Levels of RPP7-coding transcripts are correlated with levels of plant immunity. (A) RPP7 transcript levels determined by qRT-PCR. *ACTIN8* (*ACT8*) served as an internal control.  $E2_{pro}:HA-E2$ : EDM2 complementation lines expressing in the *edm2-2* background HA-tagged EDM2 driven by the native EDM2 promoter ( $E2_{pro}$ ). In  $E2_{pro}:HA-EDM2a$  and  $-b$ , transcript levels of RPP7 are intermediate and only partially reverted to those in Col-0. In  $E2_{pro}:HA-EDM2c$ , transcript levels of RPP7 are almost completely reverted to those in Col-0. (B) Two-week-old *Arabidopsis* seedlings were spray-infected with  $5 \times 10^4$  *Hyaloperonospora arabidopsidis* Hiks1 spores  $ml^{-1}$  and scored for disease symptoms 7 d later. Individual cotyledons of the infected plants were assigned to defined categories based on the strongest type of infection symptom they exhibited using the following classification scale: discrete hypersensitive response (HR) sites < extended HR sites (eHR) < trailing necrosis (TN) < free *H. arabidopsidis* hyphae (fH) < *H. arabidopsidis* oospores (Oo) < *H. arabidopsidis* sporangiophores (Sp). HR is typically associated with full immunity; eHR and TN indicate partially failed immunity; fH, Oo, and Sp are typically observed in fully susceptible plant tissues (1).

1. Tsuchiya T, Eulgem T (2011) EMSY-like genes are required for full RPP7-mediated race-specific immunity and basal defense in *Arabidopsis*. *Mol Plant Microbe Interact* 24(12):1573–1581.

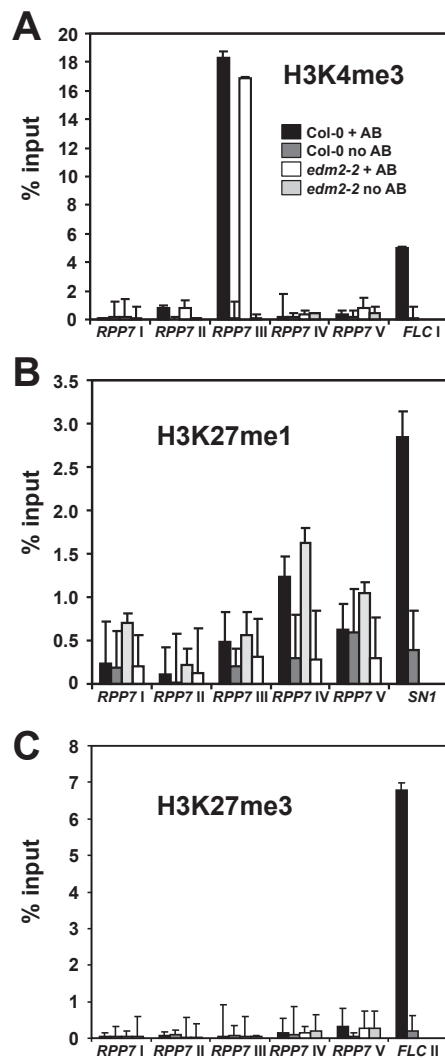

**Fig. S2.** Levels of H3K4me3, H3K27me1, and H3K27me3 at *RPP7* determined by ChIP. ChIP-qPCR to measure levels of H3K4me3 (A), H3K27me1 (B), and H3K27me3 (C) at *RPP7*. Five different *RPP7* regions marked in Fig. 1A were tested. Regions of *FLC* (*FLOWERING LOCUS C*; AT5G10140) and *SN1* (a short interspersed nuclear retroelement) served as positive controls. ChIP was performed with antibodies against histone modifications (+ AB) or no antibody controls (no AB). Signals from the ChIP assays are represented as percentage of input. The y axes represent % input. Error bars represent SEM for two biological replicates with three technical replicates each.

|                 |     |                                                               |     |
|-----------------|-----|---------------------------------------------------------------|-----|
| COPIA-R7 5'-LTR | 1   | TATCAACACAATACAGGTAAGAGCAGAGGCTTTCTCTGGCAAACGACAATACGTTGTCTGT | 60  |
| COPIA-R7 3'-LTR | 1   | TATCAACACAATACAGGTAAGAGCAGAGGCTTTCTCTGGCAAACGACAATACGTTGTCTGT | 60  |
| *****           |     |                                                               |     |
| COPIA-R7 5'-LTR | 61  | TTCGGCTAATGGAGCAAAGAGGAAAATGAAACAGATGGGCTCGCACAACCAAGCCCAA    | 120 |
| COPIA-R7 3'-LTR | 61  | TTCGGCTAATGGAGCAAAGAGGAAAATGAAACAGATGGGCTCGCACAACCAAGCCCAA    | 120 |
| *****           |     |                                                               |     |
| COPIA-R7 5'-LTR | 121 | GAAGCAGA----GGCAACGGTCATCTGTTTCAAGTAAACAGAGTCTAGAATCTTCCTC    | 174 |
| COPIA-R7 3'-LTR | 121 | GAAGCAGAAGTGGAGCAACGGTCATCTGTTTCAAGTAAACAGAGTCTAGAATCTTCCTC   | 180 |
| *****           |     |                                                               |     |
| COPIA-R7 5'-LTR | 175 | AAGTAATGACAAAAGTGGAGCTGGCAATAAGGAGACAACGACCTTGTACGGCAAAGCA    | 234 |
| COPIA-R7 3'-LTR | 181 | AAGTAATGACAAAAGTGGAGCTGGCAATAAGGAGACAACGACCTTGTACGGCAAAGCA    | 240 |
| *****           |     |                                                               |     |
| COPIA-R7 5'-LTR | 235 | GTTCACGTAAGCTCGAGAATCGTTTCTCAACCCCTTGATTCAGAAGACTCAACTTGATG   | 294 |
| COPIA-R7 3'-LTR | 241 | GTTCACGTAAGCTCGAGAATCGTTTCTCAACCCCTTGATTCAGAAGACTCAACTTGATG   | 300 |
| *****           |     |                                                               |     |
| COPIA-R7 5'-LTR | 295 | TATGACATCTGCCAATGCTCTTAGGGTTTGTAGCTAAGTCTCCACCTTGTATTTAAGTA   | 354 |
| COPIA-R7 3'-LTR | 301 | TATGACATCTGCCAATGCTCTTAGGGTTTGTAGCTAAGTCTCCACCTTGTATTTAAGTA   | 360 |
| *****           |     |                                                               |     |
| COPIA-R7 5'-LTR | 355 | TTCTCAAACCTCAAGTTGTAAGCTTAAAGCAAACATCAATGAAAACCTAAAAAGATTGAT  | 414 |
| COPIA-R7 3'-LTR | 361 | TTCTCAAACCTCAAGTTGTAAGCTTAAAGCAAACATCAATGAAAACCTAAAAAGATTGAT  | 420 |
| *****           |     |                                                               |     |
| COPIA-R7 5'-LTR | 415 | TTTGTCTTCA                                                    | 424 |
| COPIA-R7 3'-LTR | 421 | TTTGTCTTCA                                                    | 430 |
| *****           |     |                                                               |     |

Identity = 98.1%

Fig. S3. Alignment of 5'- and 3'-LTR nucleotide sequences of *COPIA-R7*. Identical nucleotides are represented by asterisks (\*). Dashes (-) indicate gaps.

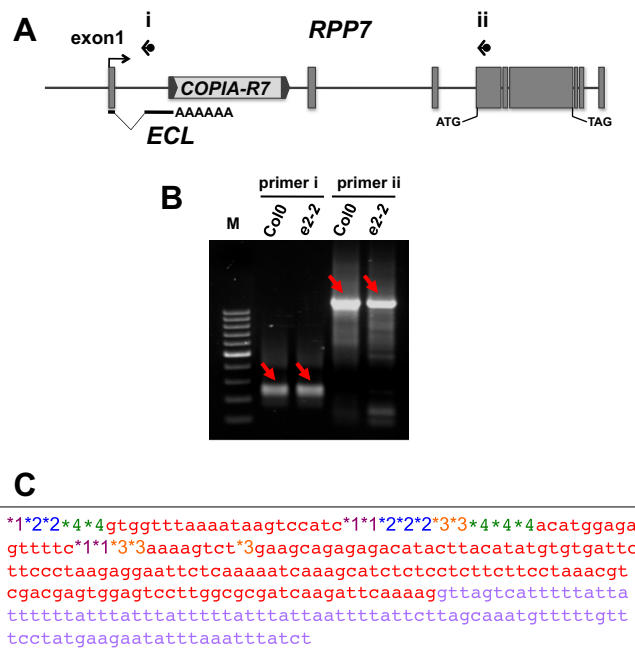

Fig. S4. ECL and the *RPP7*-coding mRNA share a cluster of common TSSs. (A) Schematic representation of the *RPP7* locus in *Arabidopsis Col-0* accession. Black horizontal arrows represent PCR primers used for 5'RACE (i and ii). (B) The 5'RACE analysis of poly(A)-selected total mRNAs extracted from *Col-0* or *edm-2* mutant plants with primers represented in A. The bands marked with red arrows were further analyzed by sequencing. M, GeneRuler 100 bp DNA ladder (Thermo Scientific). (C) Nucleotide sequences at the region of transcription start sites of ECL and *RPP7*-coding transcripts. Exon and intron sequences are colored by red or light blue, respectively. The TSSs revealed by sequencing of cloned 5'RACE products in B are indicated by asterisks with numbers. \*1, TSSs of ECL in *Col-0*; \*2, TSSs of ECL in *edm-2*; \*3, TSSs of *RPP7*-coding transcripts in *Col-0*; \*4, TSSs of *RPP7*-coding transcripts in *edm-2*.



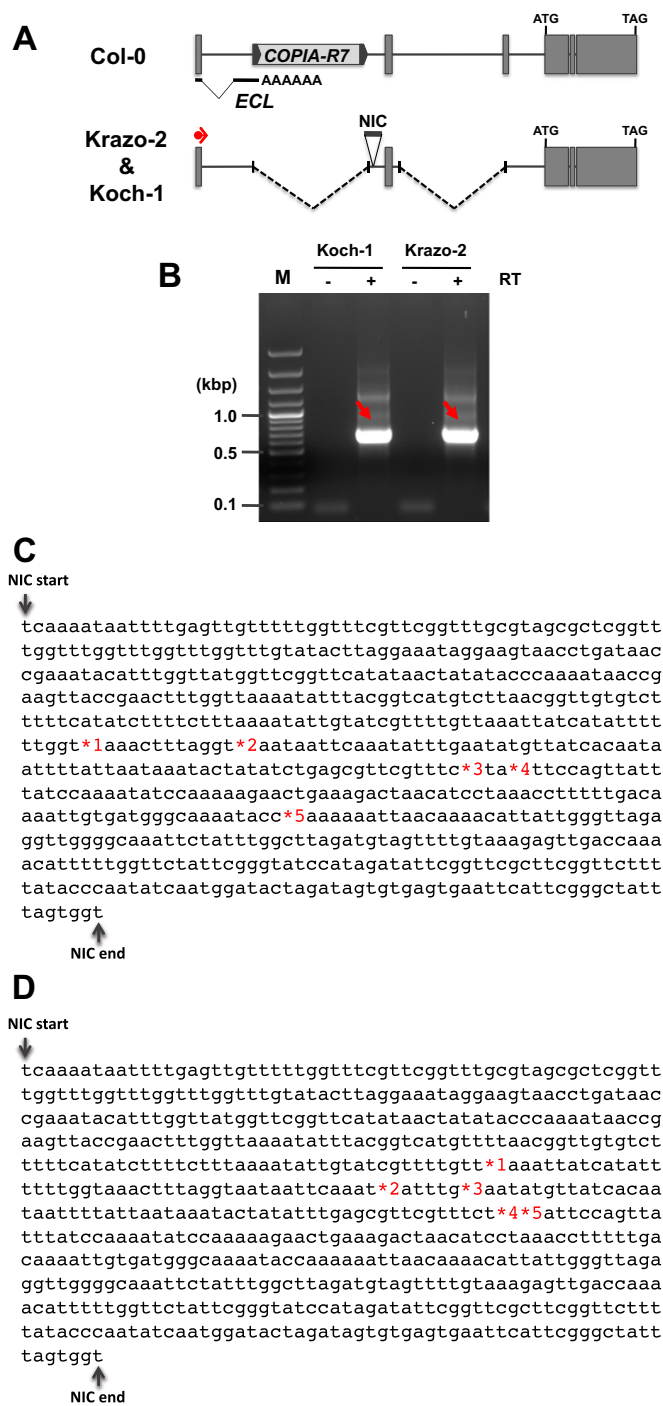

**Fig. S6.** Polyadenylation sites of ECL<sub>Krazo-2</sub> and ECL<sub>Koch-1</sub>. (A) Schematic representation of Col-0 *RPP7* and its orthologous loci of Krazo-2 and Koch-1. Red horizontal arrow represents the PCR primer used for 3'RACE. (B) The 3'RACE analysis of poly(A)-selected total mRNAs extracted from Koch-1 or Krazo-2 with the primer represented in A. The 3'RACE was performed with (+) or without (-) reverse-transcriptase (RT). The bands marked with red arrows were cloned and further analyzed by sequencing. M, GeneRuler 100 bp DNA ladder (Fermentas). (C and D) Nucleotide sequences of the sequence block of NIC in Koch-1 (C) or Krazo-2 (D). Polyadenylation sites revealed by sequencing of cloned 3'RACE products shown in B (five clones for each accession) are indicated by asterisks with numbers.

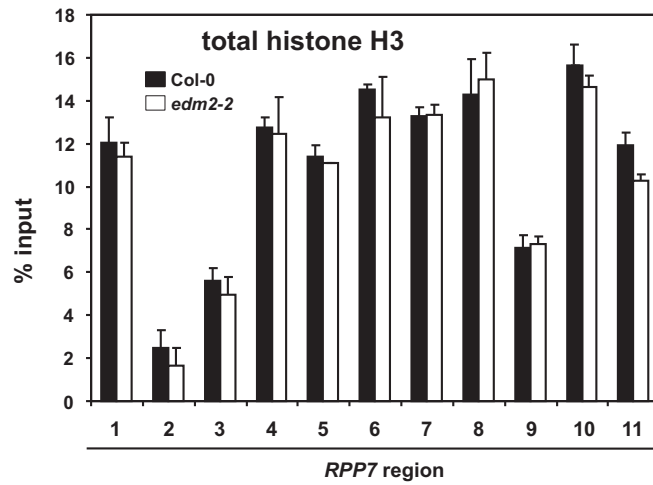

**Fig. S7.** Levels of total histone H3 at *RPP7* determined by ChIP. ChIP-qPCR to measure levels of histone H3 at *RPP7*. Eleven different *RPP7* regions marked in Fig. 3A were tested. The antibody used recognizes histone H3 regardless of modifications at the N-terminal tail of histone H3. The y axis represents % input. Error bars represent SEM for two biological replicates with three technical replicates each.

**Table S1. Oligonucleotides used in this study**

| Name                               | Sequences (5'→3')            | Comments                                                                                  |
|------------------------------------|------------------------------|-------------------------------------------------------------------------------------------|
| <b>For transcript measurements</b> |                              |                                                                                           |
| RPP7 unsp RT F1                    | TTGGCGCGATCAAGATTCAA         | Unspliced RPP7 transcripts.<br>Combination a in Fig. 1A.                                  |
| RPP7 unsp RT R1                    | TAGGAATGCTGTTCATTTTACAAGA    | Unspliced RPP7 transcripts. Combination a<br>in Fig. 1A. Used for reverse-transcription   |
| COPIA-R7 RT F                      | CTCACAAACGGATCTCCTAACCTA     | COPIA-R7 transcripts. Combination b<br>in Fig. 1A.                                        |
| COPIA-R7 RT F                      | GCTCCCGGAAAACCTGAACTGA       | COPIA-R7 transcripts. Combination b<br>in Fig. 1A.                                        |
| RPP7 coding RT F                   | ACGTGAACTATATCAATTGTTGGAA    | RPP7-coding transcripts. Combination c<br>in Fig. 1A.                                     |
| RPP7 coding RT R                   | TTTGTAGGCGCAACGATACTCT       | Also used in Fig. 6 A, B, and D.<br>RPP7-coding transcripts. Combination c<br>in Fig. 1A. |
| EDM2 RT F                          | CTTGGACCCCATGTTAGCTC         | Also used in Fig. 6 A, B, and D.<br>For EDM2 transcripts                                  |
| EDM2 RT R                          | TTAAGAGATTATGTCCGCTAGGTT     | For EDM2 transcripts                                                                      |
| RPP7 exon1 F                       | ATCTCTCTCTTCTTCCCTAAACGTC    | Specific to exon1 of RPP7. Primer a<br>in Fig. 2A. Also used in Fig. 6A.                  |
| RPP7 exon1 R                       | TCTTGATCGCGCCAAGGACTC        | Specific to exon1 of RPP7. Primer b<br>in Fig. 2A. Also used in Fig. 6A.                  |
| RPP7 exon2 F                       | CAAGACTAAATAAGATAGGAAATGGGTT | Specific to exon2 of RPP7.                                                                |
| RPP7 exon2 R                       | ATACTGCTAGACGCTGGACT         | Specific to exon2 of RPP7.                                                                |
| RPP7 exon3 F                       | AATTTGGCTGAATGACTTAATGGT     | Specific to exon3 of RPP7.                                                                |
| RPP7 exon3 R                       | GGTAAATTATACACAGTAGCCGTTG    | Specific to exon3 of RPP7.                                                                |
| RPP7 exon4 F                       | TTACCTGAAGAATGTATGGCAA       | Specific to exon4 of RPP7.                                                                |
| RPP7 exon4 R                       | TTCCAACAATTGATATAGTTCACGTT   | Specific to exon4 of RPP7.                                                                |
| ECL R                              | TGAATCCAAGAATGAGATCCACGTA    | For ECL transcripts. Used with<br>RPP7 exon1 F. Primer c in Fig. 2A.                      |
| ECL F2                             | CATATGTGTGATTCTTCCCTAAGAGG   | For ECL transcripts. Used in<br>Fig. 6 A and B.                                           |
| ECL R2                             | AAATCTTGACAGAGGTCCTGA        | For ECL transcripts. Used in Fig. 6 A and B.                                              |
| ACT8 RT F                          | CAGTGTCTGGATTGGTGGTTCTATC    | ACTIN8 internal control.                                                                  |
| ACT8 RT R                          | ATCCCGTCATGGAAACGATGT        | ACTIN8 internal control.                                                                  |
| <b>For ChIP-qPCR</b>               |                              |                                                                                           |
| RPP7 ChIP I F                      | CCAGCCCATTTTAAACCTGT         | Region I in Fig. 1A and Fig. S3.<br>Region 1 in Fig. 3A.                                  |
| RPP7 ChIP I R                      | GAAGAGTTTATCCGTTATCTATTCTGT  | Region I in Fig. 1A and Fig. S3.<br>Region 1 in Fig. 3A.                                  |
| RPP7 ChIP II F                     | ACTATGCCAATAATTATAGTAGCCGAC  | Region II in Fig. 1A and Fig. S3.<br>Region 2 in Fig. 3A.                                 |
| RPP7 ChIP II R                     | AGCCTTACTTTGAATTATCTTGATTCGT | Region II in Fig. 1A and Fig. S3.<br>Region 2 in Fig. 3A.                                 |
| RPP7 ChIP III F                    | AATGAACAGCAACTAGAGGCA        | Region III in Fig. 1A and Fig. S3.<br>Region 1 in Fig. 5B.                                |
| RPP7 ChIP III R                    | AATACCCAATCCGAACCTGAACG      | Region III in Fig. 1A and Fig. S3.<br>Region 1 in Fig. 5B.                                |
| RPP7 ChIP IV F                     | AAACATCTCAAATTGTGTACCCGT     | Region 3 in Fig. 3A.                                                                      |
| RPP7 ChIP IV R                     | ATCGATGTCGGAGACCACACT        | Region IV in Fig. 1A and Fig. S3.<br>Region 7 in Fig. 3A.                                 |
| RPP7 ChIP V F                      | CTTACTTGCAATTGTTCCAGATCGC    | Region IV in Fig. 1A and Fig. S3.<br>Region 7 in Fig. 3A.                                 |
| RPP7 ChIP V R                      | TAGGAAATGTTTCGTCTATCTCCC     | Region V in Fig. 1A and Fig. S3.<br>Region 11 in Fig. 3A.                                 |
| RPP7 ChIP 4 F                      | TCGCCGATCTACTTTCTAGTCAGGA    | Region V in Fig. 1A and S3.<br>Region 11 in Fig. 3A.                                      |
| RPP7 ChIP 4 R                      | CTCAAGTAGTGTACCCGCTCA        | Region 4 in Fig. 3A.                                                                      |
| RPP7 ChIP 5 F                      | AATAGTGTGATTAGCTTCTCCGTT     | Region 4 in Fig. 3A.                                                                      |
| RPP7 ChIP 5 R                      | CCTACAAACACTGGTTATATCTGGC    | Region 5 in Fig. 3A. Region 2 in Fig. 5B.                                                 |
| RPP7 ChIP 6 F                      | CCCAAGAAGCAGAGGCAACG         | Region 5 in Fig. 3A. Region 2 in Fig. 5B.                                                 |
| RPP7 ChIP 6 R                      | TTCTGAATCAAGGTTGAGAAACGA     | Region 6 in Fig. 3A. Region 3 in Fig. 5B.                                                 |
| RPP7 ChIP 6 R                      | TTCTGAATCAAGGTTGAGAAACGA     | Region 6 in Fig. 3A. Region 3 in Fig. 5B.                                                 |



Table S1. Cont.

| Name              | Sequences (5'→3')                  | Comments                                                     |
|-------------------|------------------------------------|--------------------------------------------------------------|
| RPP7 ChIP 8 F     | TCAACAACATATCTCATGCCCTC            | Region 8 in Fig. 3A.                                         |
| RPP7 ChIP 8 R     | AGGAGATTAATCAGAAAATTCGCAGT         | Region 8 in Fig. 3A.                                         |
| RPP7 ChIP 9 F     | CCACTTACTTCAGGAACATCGC             | Region 9 in Fig. 3A.                                         |
| RPP7 ChIP 9 R     | TGATGTATCTTAGAATACGCTTCAGG         | Region 9 in Fig. 3A.                                         |
| RPP7 ChIP 10 F    | CAAGACTAAATAAGATAGGAAATGGGTT       | Region 10 in Fig. 3A.                                        |
| RPP7 ChIP 10 R    | TTGATACTGCTAGACGCTGGAC             | Region 10 in Fig. 3A.                                        |
| NV ECL ChIP i F   | AATGAACAGCAACTAGAGGCA              | ChIP in Krazo-2 and Koch-1.                                  |
| NV ECL ChIP i R   | AATACCCAATCCTAACTTGAACGG           | Region i in Fig. 5B.                                         |
| NV ECL ChIP ii F  | AATAGTGTGATTAGCTTCTCCGTT           | ChIP in Krazo-2 and Koch-1.                                  |
| NV ECL ChIP ii R  | CCTACAAACACTGGTTATATCTGGC          | Region ii in Fig. 5B.                                        |
| NV ECL ChIP iii F | AAAATGTGATGGGCAAAATACCAA           | ChIP in Krazo-2 and Koch-1.                                  |
| NV ECL ChIP iii R | CTATGGATACCCGAATAGAACCA            | Region iii in Fig. 5B.                                       |
| FLC ChIP I F      | GAACCCAAACCTGAGGATCA               | ChIP in Krazo-2 and Koch-1.                                  |
| FLC ChIP I R      | GGATGCGTCACAGAGAACAG               | Region i in Fig. 5B.                                         |
| FLC ChIP II F     | CGCCCTTAATCTTATCATCGTT             | Positive control for H3K4me3 in Fig. S3A.                    |
| FLC ChIP II R     | TTTTCAATTTCTAGAGGCCA               | Specific to a region in <i>FLOWERING LOCUS C</i> (AT5G10140) |
| A122              | CCAGAAATTCATCTTCTTTGGAAAAG         | Positive control for H3K4me3 in Fig. S3A.                    |
| A123              | GCCCAGTGGTAAATCTCTCAGATAGA         | Specific to a region in <i>FLOWERING LOCUS C</i> (AT5G10140) |
| Mu1 ChIP F        | ACATTAGTCTGGAAATGGCTT              | Positive control for H3K27me3 in Fig. S3C.                   |
| Mu1 ChIP R        | CAACTACCGAGCTTATAGAACACC           | Specific to a region in <i>FLOWERING LOCUS C</i> (AT5G10140) |
| ACT8 ChIP F       | CTAAAGAGACATCGTTTCCATGACGG         | Positive control for H3K27me3 in Fig. S3C.                   |
| ACT8 ChIP R       | TCCTTAGACATCTCTCCAACGC             | Specific to a region in <i>FLOWERING LOCUS C</i> (AT5G10140) |
| For RACE          |                                    |                                                              |
| Col0 3'RACE 1-1   | GCATCTCTCCTTCTTCTTAAACGTC          | Positive control for H3K27me1 in Fig. S3B.                   |
| Col0 3'RACE 1-2   | AGTCCTTGGCCGATCAAGATTCAA           | Specific to <i>SN1</i> (1)                                   |
| Col0 3'RACE 2-1   | TTGGCATTCCACTTCCAAACACTCC          | Positive control for H3K9me2.                                |
| Col0 3'RACE 2-2   | TCTTACTGCAAACCTGCCTTTCACG          | Positive control for H3K9me2.                                |
| Col0 3'RACE 3-1   | ACATGTTGACATTGAGAAGTGATGATGC       | Negative control for H3K9me2.                                |
| Col0 3'RACE 3-2   | GCAATGTCATATAGAACTTAACCGTAACCCCTCT | Negative control for H3K9me2.                                |
| Col0 3'RACE 4-1   | GGAAATGGGTTGATACAAAGAAGTTGTCC      |                                                              |
| Col0 3'RACE 4-2   | CAGCGTCTAGCAGTATCAAGCAACTC         |                                                              |
| Col0 5'RACE 1-1   | ACCACCAGCGAGGAATGCTT               |                                                              |
| Col0 5'RACE 1-2   | GAGTCTCTCCAGTCACGGCAA              |                                                              |
| Col0 5'RACE 2-1   | TCCTTCTTCCATATGTCTGCAAGGACAATTA    |                                                              |
| Col0 5'RACE 2-2   | TTCCAACAATTGATATAGTTACAGTTGGAG     |                                                              |
| NV 3'RACE 1-1     | GTTATGGCAAAGGTTTTCTCAGGG           |                                                              |
| NV 3'RACE 1-2     | TGTGTTTCTAGGTTTTTCAGCGGTCA         |                                                              |

Table S1. Cont.

| Name                                                     | Sequences (5'→3')                                       | Comments                                                                   |
|----------------------------------------------------------|---------------------------------------------------------|----------------------------------------------------------------------------|
| For genomic DNA and cDNA cloning in the natural variants |                                                         |                                                                            |
| NV gR7-1 F                                               | CGGGGACCACTAGCCATTACTTTCTGTGAAATGTATCAAG                | PCR cloning of a part of <i>RPP7</i> genomic DNA in Krazo-2 and Koch-1.    |
| NV gR7-1 R                                               | TGAATCCAAAGAATGAGATCCACGTA                              | Used with NV gR7-1 F.                                                      |
| NV gR7-2 F                                               | CTTAGCATTCCTCGCTGGT                                     | PCR cloning of a part of <i>RPP7</i> genomic DNA in Krazo-2 and Koch-1.    |
| NV gR7-2 R                                               | ATACTGCTAGACGCTGGACT                                    | Used with NV gR7-2 F.                                                      |
| NV gR7-3 F                                               | CAAGACTAATAAGATAGGAAATGGGTT                             | PCR cloning of a part of <i>RPP7</i> genomic DNA in Krazo-2 and Koch-1.    |
| NV gR7-3 R                                               | TAGGAAATGTTTCGTCGTATCTCCC                               | Used with NV gR7-3 F.                                                      |
| NV gR7-4 F                                               | CATCATATAAAACGTTCCCATGCAA                               | PCR cloning of a part of <i>RPP7</i> genomic DNA in Krazo-2 and Koch-1.    |
| NV gR7-4 R                                               | CCAAGATACTGACAGAATAAATATGCAGA                           | Used with NV gR7-4 F.                                                      |
| NV gR7-5 F                                               | TATTTCTTTTTGTGATCGGCAGGT                                | PCR cloning of a part of <i>RPP7</i> genomic DNA in Krazo-2 and Koch-1.    |
| NV gR7-5 R                                               | TGGCTCTGCTGTTACATATCTCG                                 | Used with NV gR7-5 F.                                                      |
| NV cR7 F                                                 | CTTACATATGTGTGATTCTTCCCTAAGAGG                          | Amplify <i>RPP7</i> cDNA in Krazo-2 and Koch-1.                            |
| NV cR7 R                                                 | CTGTGATTGCTGAGAGCATTCCTA                                | Amplify <i>RPP7</i> cDNA in Krazo-2 and Koch-1.                            |
| cEDM2 F                                                  | GGGGACAAGTTTGTACAAAAAAGCAGGCTTCACAATGACGTTTCGTTGACGATGA | Amplify <i>EDM2</i> cDNA in Krazo-2 and Koch-1. Contains <i>attB</i> site. |
| cEDM2 R                                                  | GGGGACCACTTTGTACAAGAAAGCTGGGTCCTAGTCATTAATCCAACCGCC     | Amplify <i>EDM2</i> cDNA in Krazo-2 and Koch-1. Contains <i>attB</i> site. |
| For the <i>EDM2</i> silencing construct                  |                                                         |                                                                            |
| EDM2RNAi-F                                               | GGGGACAAGTTTGTACAAAAAAGCAGGCTAGCGATTAAACCAATATGATCCAC   | Trigger of <i>EDM2</i> silencing. Contains <i>attB</i> site.               |
| EDM2RNAi-R                                               | GGGGACCACTTTGTACAAGAAAGCTGGGTATGATAAAGAGCCTGTTTCGT      | Trigger of <i>EDM2</i> silencing. Contains <i>attB</i> site.               |

1. Wierzbicki AT, Haag JR, Pikaard CS (2008) Noncoding transcription by RNA polymerase Pol IVb/Pol V mediates transcriptional silencing of overlapping and adjacent genes. *Cell* 135(4): 635–648.
